# Supplementary material for: Association between hearing loss and development of dementia using formal behavioural audiometric testing within the Mayo Clinic Study of Aging (MCSA): a prospective population-based study
Source: PubMed Central journal article supplement — Lancet Healthy Longev. Author manuscript; Available in PMC 2023 Jan 10. (PMC9831680; doi:10.1016/s2666-7568(22)00241-0), 2022-11-18
Supplement: NIHMS1855538-supplement-1.pdf [file NIHMS1855538-supplement-1.pdf]

# THE LANCET

## Healthy Longevity

### Supplementary appendix

This appendix formed part of the original submission and has been peer reviewed. We post it as supplied by the authors.

Supplement to: Marinelli JP, Lohse CM, Fussell WL, et al. Association between hearing loss and development of dementia using formal behavioural audiometric testing within the Mayo Clinic Study of Aging (MCSA): a prospective population-based study. *Lancet Healthy Longevity* 2022; published online Nov 18. [https://doi.org/10.1016/S2666-7568\(22\)00241-0](https://doi.org/10.1016/S2666-7568(22)00241-0).

# Association between hearing loss and development of dementia using formal behavioural audiometric testing within the Mayo Clinic Study of Aging (MCSA): a prospective population-based study

## ONLINE APPENDIX

### Table of Contents

|                                                                                                                                           |      |
|-------------------------------------------------------------------------------------------------------------------------------------------|------|
| Diagnosis and procedure codes used to identify individuals with cochlear implants.....                                                    | 2-3  |
| Associations of informant-based hearing difficulties with demographic and clinical features and exposures.....                            | 4    |
| Associations of PTA as continuous with demographic and clinical features.....                                                             | 5    |
| Associations of WRS as continuous with demographic and clinical features.....                                                             | 6    |
| Associations with development of dementia after adjusting for the duration between the audiogram and enrollment visit.....                | 7    |
| Associations with development of mild cognitive impairment among cognitively unimpaired participants at enrollment.....                   | 8    |
| Associations of PTA, WRS, and informant-based hearing difficulties with longitudinal changes in domain and global cognition z-scores..... | 9-11 |
| Associations of PTA with cross-sectional outcomes at enrollment.....                                                                      | 12   |
| Associations of WRS with cross-sectional outcomes at enrollment.....                                                                      | 13   |
| Associations of informant-based hearing difficulties with cross-sectional outcomes at enrollment.....                                     | 14   |

**Table S1.** Diagnosis and procedure codes used to identify individuals with cochlear implants.

| <b>Diagnosis</b>    | <b>Code</b>                                                                                                                                                                                                              |
|---------------------|--------------------------------------------------------------------------------------------------------------------------------------------------------------------------------------------------------------------------|
| Mayo Clinic         | 09963360                                                                                                                                                                                                                 |
| Internal            | 34509112                                                                                                                                                                                                                 |
| Codes <sup>18</sup> | 34509115                                                                                                                                                                                                                 |
| ICD-10              | Z45.321<br>Z96.21                                                                                                                                                                                                        |
| <b>Procedure</b>    | <b>Code</b>                                                                                                                                                                                                              |
| CPT                 | 69930<br>69714<br>69715<br>69717<br>69718<br>92601<br>92602<br>92603<br>92604                                                                                                                                            |
| ICD-9               | 20.96<br>20.97<br>20.98                                                                                                                                                                                                  |
| ICD-10              | 09HD05Z<br>09HD06Z<br>09HD35Z<br>09HD36Z<br>09HD45Z<br>09HD46Z<br>09HE05Z<br>09HE06Z<br>09HE35Z<br>09HE36Z<br>09HE45Z<br>09HE46Z<br>F0BZ01Z<br>F0BZ02Z<br>F0BZ09Z<br>F0BZ0KZ<br>F0BZ0PZ<br>F0BZ0YZ<br>F14Z01Z<br>F14Z02Z |

F14Z03Z  
F14Z04Z  
F14Z05Z  
F14Z07Z  
F14Z09Z  
F14Z0KZ  
F14Z0LZ  
F14Z0PZ  
F14Z0YZ  
F14Z0ZZ  
F00Z19Z  
F00Z29Z  
F00Z59Z  
F13Z09Z  
F13ZP9Z

---

**Table S2.** Associations of informant-based hearing difficulties with demographic and clinical features and exposures.

| <b>Demographic and clinical features*</b>  | <b>Hearing Difficulties</b> |              | <b>p value</b> |
|--------------------------------------------|-----------------------------|--------------|----------------|
|                                            | No<br>n=789                 | Yes<br>n=388 |                |
| Age in years                               | 75 (9)                      | 76 (9)       | 0.12           |
| Sex                                        |                             |              |                |
| Female                                     | 457 (58)                    | 132 (34)     | <0.0001        |
| Male                                       | 332 (42)                    | 256 (66)     |                |
| Years of education                         |                             |              |                |
| ≤12                                        | 212 (27)                    | 127 (33)     | 0.18           |
| 13-16                                      | 370 (47)                    | 161 (41)     |                |
| >16                                        | 205 (26)                    | 100 (26)     |                |
| Smoking status                             |                             |              |                |
| Never                                      | 438 (56)                    | 167 (43)     | <0.0001        |
| Current or former                          | 351 (44)                    | 221 (57)     |                |
| Comorbidities                              |                             |              |                |
| Diabetes                                   | 131 (17)                    | 86 (22)      | 0.02           |
| Hypertension                               | 568 (72)                    | 283 (73)     | 0.76           |
| Stroke                                     | 47 (6)                      | 15 (4)       | 0.13           |
| Heart disease                              | 308 (39)                    | 190 (49)     | 0.001          |
| Beck Depression Inventory II ≥13           | 58 (7)                      | 41 (11)      | 0.05           |
| APOE ε4 carriership                        | 179 (24)                    | 105 (28)     | 0.13           |
| Hearing rehabilitation                     | 249 (32)                    | 238 (61)     | <0.0001        |
| <b>Exposures*</b>                          |                             |              |                |
| PTA in dB HL                               | 29 (14)                     | 40 (16)      | <0.0001        |
| Hearing severity classification            |                             |              |                |
| Normal hearing or mild hearing loss        | 613 (78)                    | 191 (49)     | <0.0001        |
| Moderate, severe, or profound hearing loss | 176 (22)                    | 197 (51)     |                |
| PTA >25 dB HL                              | 429 (54)                    | 320 (82)     | <0.0001        |
| WRS in %                                   | 94 (11)                     | 86 (18)      | <0.0001        |
| WRS <90%                                   | 125 (16)                    | 143 (38)     | <0.0001        |
| WRS <100%                                  | 302 (39)                    | 236 (62)     | <0.0001        |

\*Summarized with mean (SD) or n (%).

**Table S3.** Associations of PTA as continuous with demographic and clinical features.

| <b>Feature</b>               | <b>PTA in dB HL*</b> | <b>p value</b> |
|------------------------------|----------------------|----------------|
| Age in years                 | 0.49 (0.44-0.53)     | <0.0001        |
| Sex                          |                      |                |
| Female                       | 30 (15)              | <0.0001        |
| Male                         | 34 (16)              |                |
| Years of education           |                      |                |
| ≤12                          | 37 (16)              | <0.0001        |
| 13-16                        | 30 (15)              |                |
| >16                          | 31 (16)              |                |
| Smoking status               |                      |                |
| Never                        | 32 (16)              | 0.07           |
| Current or former            | 33 (16)              |                |
| Diabetes                     |                      |                |
| No                           | 32 (16)              | 0.004          |
| Yes                          | 35 (16)              |                |
| Hypertension                 |                      |                |
| No                           | 27 (15)              | <0.0001        |
| Yes                          | 34 (16)              |                |
| Stroke                       |                      |                |
| No                           | 32 (16)              | 0.04           |
| Yes                          | 36 (14)              |                |
| Heart disease                |                      |                |
| No                           | 30 (16)              | <0.0001        |
| Yes                          | 36 (15)              |                |
| Beck Depression Inventory II |                      |                |
| <13                          | 32 (16)              | 0.30           |
| ≥13                          | 31 (15)              |                |
| APOE ε4 carriership          |                      |                |
| No                           | 33 (16)              | 0.10           |
| Yes                          | 31 (15)              |                |
| Hearing rehabilitation       |                      |                |
| No                           | 25 (13)              | <0.0001        |
| Yes                          | 43 (13)              |                |

\*Summarized with correlation coefficient (95% CI) or mean (SD).

**Table S4.** Associations of WRS as continuous with demographic and clinical features.

| <b>Feature</b>               | <b>WRS in %*</b>   | <b>p value</b> |
|------------------------------|--------------------|----------------|
| Age in years                 | -0.37 (-41 to -32) | <0.0001        |
| Sex                          |                    |                |
| Female                       | 94 (12)            | <0.0001        |
| Male                         | 89 (15)            |                |
| Years of education           |                    |                |
| ≤12                          | 89 (16)            | 0.01           |
| 13-16                        | 93 (12)            |                |
| >16                          | 92 (13)            |                |
| Smoking status               |                    |                |
| Never                        | 92 (14)            | 0.52           |
| Current or former            | 91 (14)            |                |
| Diabetes                     |                    |                |
| No                           | 92 (13)            | 0.008          |
| Yes                          | 89 (17)            |                |
| Hypertension                 |                    |                |
| No                           | 94 (12)            | <0.0001        |
| Yes                          | 90 (15)            |                |
| Stroke                       |                    |                |
| No                           | 91 (14)            | 0.68           |
| Yes                          | 91 (13)            |                |
| Heart disease                |                    |                |
| No                           | 93 (12)            | <0.0001        |
| Yes                          | 89 (16)            |                |
| Beck Depression Inventory II |                    |                |
| <13                          | 91 (14)            | 0.32           |
| ≥13                          | 93 (11)            |                |
| APOE ε4 carriership          |                    |                |
| No                           | 91 (15)            | 0.02           |
| Yes                          | 93 (12)            |                |
| Hearing rehabilitation       |                    |                |
| No                           | 96 (10)            | <0.0001        |
| Yes                          | 85 (17)            |                |

\*Summarized with correlation coefficient (95% CI) or mean (SD).

**Table S5.** Associations with development of dementia after adjusting for the duration between the audiogram and enrollment visit.

| <b>Exposure</b>                                  | <b>HR (95% CI)*</b> | <b>p value*</b> |
|--------------------------------------------------|---------------------|-----------------|
| PTA as continuous (10-dB HL increase)            | 0.97 (0.86-1.09)    | 0.62            |
| PTA $\geq 40$ vs $< 40$ dB HL                    | 1.05 (0.74-1.49)    | 0.77            |
| PTA $> 25$ vs $\leq 25$ dB HL                    | 0.78 (0.54-1.12)    | 0.18            |
| WRS as continuous (10% decrease)                 | 0.97 (0.88-1.06)    | 0.49            |
| WRS $< 90$ vs $\geq 90\%$                        | 0.94 (0.67-1.32)    | 0.72            |
| WRS $< 100$ vs $100\%$                           | 1.10 (0.81-1.50)    | 0.53            |
| Informant-based hearing difficulties (yes vs no) | 1.93 (1.43-2.59)    | $< 0.0001$      |

\*Hazard ratio (HR), 95% confidence interval (CI), and p value from multivariable Cox proportional hazards regression models with age as the timescale adjusted for sex, years of education, smoking status, diabetes, hypertension, APOE  $\epsilon 4$  carriership, hearing rehabilitation, and duration between the audiogram and enrollment visit.



**Table S6.** Associations with development of mild cognitive impairment among cognitively unimpaired participants at enrollment.

| <b>Exposure</b>                                  | <b>HR (95% CI)*</b> | <b>p value*</b> |
|--------------------------------------------------|---------------------|-----------------|
| PTA as continuous (10-dB HL increase)            | 0.95 (0.86-1.05)    | 0.35            |
| PTA $\geq$ 40 vs <40 dB HL                       | 1.02 (0.76-1.36)    | 0.91            |
| PTA >25 vs $\leq$ 25 dB HL                       | 1.00 (0.73-1.37)    | 0.98            |
| WRS as continuous (10% decrease)                 | 1.00 (0.93-1.08)    | 0.97            |
| WRS <90 vs $\geq$ 90%                            | 1.04 (0.78-1.40)    | 0.77            |
| WRS <100 vs 100%                                 | 1.26 (0.96-1.64)    | 0.09            |
| Informant-based hearing difficulties (yes vs no) | 1.36 (1.05-1.77)    | 0.02            |

\*Hazard ratio (HR), 95% confidence interval (CI), and p value from multivariable Cox proportional hazards regression models with age as the timescale adjusted for sex, years of education, smoking status, diabetes, hypertension, APOE  $\epsilon$ 4 carriership, and hearing rehabilitation.

**Table S7.** Associations of PTA, WRS, and informant-based hearing difficulties with longitudinal changes in domain and global cognition z-scores.

| <b>Exposure</b>                      | <b>Memory Z-score</b>                       |                 |
|--------------------------------------|---------------------------------------------|-----------------|
|                                      | <i>PE (95% CI)*</i>                         | <i>p value*</i> |
| PTA in dB HL                         |                                             |                 |
| <40                                  | -0.026 (-0.037 to -0.014)                   | 0.05            |
| ≥40                                  | -0.048 (-0.066 to -0.029)                   |                 |
| PTA in dB HL                         |                                             |                 |
| ≤25                                  | -0.009 (-0.025 to 0.007)                    | 0.0005          |
| >25                                  | -0.046 (-0.058 to -0.033)                   |                 |
| WRS                                  |                                             |                 |
| ≥90%                                 | -0.030 (-0.041 to -0.019)                   | 0.34            |
| <90                                  | -0.042 (-0.064 to -0.021)                   |                 |
| WRS                                  |                                             |                 |
| 100%                                 | -0.018 (-0.032 to -0.005)                   | 0.001           |
| <100                                 | -0.051 (-0.066 to -0.036)                   |                 |
| Informant-based hearing difficulties |                                             |                 |
| No                                   | -0.030 (-0.042 to -0.018)                   | 0.50            |
| Yes                                  | -0.038 (-0.055 to -0.020)                   |                 |
|                                      | <b>Attention/Executive Function Z-score</b> |                 |
| <b>Exposure</b>                      | <i>PE (95% CI)*</i>                         | <i>p value*</i> |
| PTA in dB HL                         |                                             |                 |
| <40                                  | -0.096 (-0.108 to -0.084)                   | <0.0001         |
| ≥40                                  | -0.148 (-0.167 to -0.128)                   |                 |
| PTA in dB HL                         |                                             |                 |
| ≤25                                  | -0.081 (-0.097 to -0.064)                   | <0.0001         |
| >25                                  | -0.129 (-0.142 to -0.116)                   |                 |
| WRS                                  |                                             |                 |
| ≥90%                                 | -0.104 (-0.116 to -0.092)                   | 0.008           |
| <90                                  | -0.140 (-0.163 to -0.116)                   |                 |
| WRS                                  |                                             |                 |
| 100%                                 | -0.095 (-0.109 to -0.081)                   | 0.0005          |
| <100                                 | -0.133 (-0.149 to -0.117)                   |                 |
| Informant-based hearing difficulties |                                             |                 |
| No                                   | -0.107 (-0.120 to -0.094)                   | 0.28            |
| Yes                                  | -0.120 (-0.139 to -0.101)                   |                 |

| <b>Exposure</b>                      | <b>Language Z-score</b>   |                 |
|--------------------------------------|---------------------------|-----------------|
|                                      | <i>PE (95% CI)*</i>       | <i>p value*</i> |
| PTA in dB HL                         |                           |                 |
| <40                                  | -0.067 (-0.080 to -0.054) | <0.0001         |
| ≥40                                  | -0.121 (-0.142 to -0.100) |                 |
| PTA in dB HL                         |                           |                 |
| ≤25                                  | -0.047 (-0.065 to -0.029) | <0.0001         |
| >25                                  | -0.104 (-0.118 to -0.090) |                 |
| WRS                                  |                           |                 |
| ≥90%                                 | -0.075 (-0.088 to -0.063) | 0.009           |
| <90                                  | -0.112 (-0.136 to -0.088) |                 |
| WRS                                  |                           |                 |
| 100%                                 | -0.061 (-0.076 to -0.046) | <0.0001         |
| <100                                 | -0.112 (-0.128 to -0.095) |                 |
| Informant-based hearing difficulties |                           |                 |
| No                                   | -0.075 (-0.089 to -0.061) | 0.03            |
| Yes                                  | -0.102 (-0.122 to -0.082) |                 |

| <b>Exposure</b>                      | <b>Visuospatial Skills Z-score</b> |                 |
|--------------------------------------|------------------------------------|-----------------|
|                                      | <i>PE (95% CI)*</i>                | <i>p value*</i> |
| PTA in dB HL                         |                                    |                 |
| <40                                  | -0.023 (-0.032 to -0.015)          | 0.003           |
| ≥40                                  | -0.050 (-0.064 to -0.035)          |                 |
| PTA in dB HL                         |                                    |                 |
| ≤25                                  | -0.012 (-0.024 to 0.001)           | 0.0001          |
| >25                                  | -0.042 (-0.052 to -0.032)          |                 |
| WRS                                  |                                    |                 |
| ≥90%                                 | -0.027 (-0.036 to -0.019)          | 0.01            |
| <90                                  | -0.051 (-0.067 to -0.034)          |                 |
| WRS                                  |                                    |                 |
| 100%                                 | -0.020 (-0.030 to -0.010)          | 0.0005          |
| <100                                 | -0.048 (-0.060 to -0.036)          |                 |
| Informant-based hearing difficulties |                                    |                 |
| No                                   | -0.031 (-0.040 to -0.022)          | 0.96            |
| Yes                                  | -0.031 (-0.045 to -0.018)          |                 |

| <b>Exposure</b> | <b>Global Cognition Z-score</b> |                 |
|-----------------|---------------------------------|-----------------|
|                 | <i>PE (95% CI)*</i>             | <i>p value*</i> |
| PTA in dB HL    |                                 |                 |
| <40             | -0.067 (-0.079 to -0.055)       | <0.0001         |
| ≥40             | -0.119 (-0.138 to -0.099)       |                 |

|                                      |                           |         |
|--------------------------------------|---------------------------|---------|
| PTA in dB HL                         |                           |         |
| ≤25                                  | -0.048 (-0.064 to -0.031) | <0.0001 |
| >25                                  | -0.102 (-0.115 to -0.089) |         |
| WRS                                  |                           |         |
| ≥90%                                 | -0.076 (-0.088 to -0.064) | 0.01    |
| <90                                  | -0.108 (-0.131 to -0.085) |         |
| WRS                                  |                           |         |
| 100%                                 | -0.061 (-0.075 to -0.047) | <0.001  |
| <100                                 | -0.111 (-0.127 to -0.095) |         |
| Informant-based hearing difficulties |                           |         |
| No                                   | -0.080 (-0.093 to -0.067) | 0.48    |
| Yes                                  | -0.088 (-0.107 to -0.070) |         |

---

\*Parameter estimates (PEs), 95% CIs, and p values from multivariable linear mixed-effects models adjusted for age, sex, years of education, smoking status, diabetes, hypertension, APOE ε4 carriership, and hearing rehabilitation. The PEs represent changes in z-scores per year (i.e., the slope or trajectory) for each level of the exposure studied. For example, PEs for changes in global cognition z-scores were -0.048 and -0.102 for participants with normal hearing (PTA ≤25 dB HL) and participants with hearing loss (PTA >25 dB HL), respectively. Put another way, global cognition z-scores decreased by 0.048 per year, on average, for those with normal hearing compared with 0.102 for those with hearing loss. The PEs are expected to be negative, representing declines in cognition over time, and indeed both slopes indicate statistically significant declines in cognition as demonstrated by 95% CIs that do not include zero. The p values are from interaction terms between the exposure listed and time. In the example above, the p value of <0.0001 for the interaction term between hearing loss and time confirms that the slope, or trajectory, is steeper for participants with hearing loss compared with those with normal hearing.

**Tables S8.** Associations of PTA with cross-sectional outcomes at enrollment.

| <b>Cognitive status</b>      | <b>PTA in dB HL*</b> | <b>OR (95% CI)<sup>†</sup></b> | <b>p value<sup>†</sup></b> |
|------------------------------|----------------------|--------------------------------|----------------------------|
| Unimpaired                   | 32 (16)              |                                |                            |
| Mild cognitive impairment    | 37 (15)              | 0.96 (0.83-1.11)               | 0.58                       |
| <b>Z-score</b>               |                      | <b>PE (95% CI)<sup>†</sup></b> | <b>p value<sup>†</sup></b> |
| Memory                       | -0.25                | 0.01 (-0.04 to 0.06)           | 0.79                       |
| Attention/executive function | -0.32                | -0.03 (-0.07 to 0.02)          | 0.20                       |
| Language                     | -0.25                | -0.03 (-0.08 to 0.02)          | 0.24                       |
| Visuospatial skills          | -0.25                | -0.04 (-0.09 to 0.01)          | 0.09                       |
| Global cognition             | -0.33                | -0.04 (-0.08 to 0.01)          | 0.11                       |

\*Summarized with correlation coefficient or mean (SD).

<sup>†</sup>Odds ratio (OR), 95% confidence interval (CI), and p value from multivariable logistic model and parameter estimates (PEs), 95% CIs, and p values from multivariable linear regression models adjusted for age, sex, years of education, smoking status, diabetes, hypertension, APOE ε4 carriership, and hearing rehabilitation. OR/PEs represent the association of a 10-dB HL increase (worsening) in PTA with outcome.

| <b>Cognitive status*</b>     | <b>PTA in dB HL</b>  |                         | <b>OR (95% CI)<sup>†</sup></b> | <b>p value<sup>†</sup></b> |
|------------------------------|----------------------|-------------------------|--------------------------------|----------------------------|
|                              | <b>≤25<br/>n=437</b> | <b>&gt;25<br/>n=763</b> |                                |                            |
| Unimpaired                   | 395 (90)             | 646 (85)                |                                |                            |
| Mild cognitive impairment    | 42 (10)              | 117 (15)                | 0.80 (0.50-1.29)               | 0.36                       |
| <b>Z-score*</b>              |                      |                         | <b>PE (95% CI)<sup>†</sup></b> | <b>p value<sup>†</sup></b> |
| Memory                       | 0.10 (1.08)          | -0.40 (1.12)            | 0.08 (-0.06 to 0.23)           | 0.27                       |
| Attention/executive function | 0.29 (1.01)          | -0.42 (1.08)            | -0.11 (-0.25 to 0.03)          | 0.11                       |
| Language z-score             | 0.14 (1.08)          | -0.37 (1.11)            | 0.01 (-0.15 to 0.16)           | 0.93                       |
| Visuospatial skills          | 0.19 (1.03)          | -0.30 (1.03)            | -0.04 (-0.18 to 0.10)          | 0.56                       |
| Global cognition             | 0.25 (1.05)          | -0.47 (1.09)            | -0.05 (-0.19 to 0.09)          | 0.49                       |

\*Summarized with mean (SD) or n (%).

<sup>†</sup>Odds ratio (OR), 95% confidence interval (CI), and p value from multivariable logistic model and parameter estimates (PEs), 95% CIs, and p values from multivariable linear regression models adjusted for age, sex, years of education, smoking status, diabetes, hypertension, APOE ε4 carriership, and hearing rehabilitation. OR/PEs represent the association of hearing loss (PTA >25 vs ≤25 dB HL) with outcome.

**Tables S9.** Associations of WRS with cross-sectional outcomes at enrollment.

| Cognitive status             | WRS in %*  |                           | OR (95% CI) <sup>†</sup> | p value <sup>†</sup> |
|------------------------------|------------|---------------------------|--------------------------|----------------------|
|                              | Unimpaired | Mild cognitive impairment |                          |                      |
|                              | 92 (14)    | 89 (13)                   | 0.91 (0.79-1.04)         | 0.18                 |
| Z-score                      |            |                           | PE (95% CI) <sup>†</sup> | p value <sup>†</sup> |
| Memory                       | 0.23       |                           | -0.03 (-0.08 to 0.02)    | 0.24                 |
| Attention/executive function | 0.24       |                           | 0.00 (-0.05 to 0.04)     | 0.84                 |
| Language                     | 0.20       |                           | -0.04 (-0.09 to 0.01)    | 0.16                 |
| Visuospatial skills          | 0.18       |                           | -0.03 (-0.08 to 0.01)    | 0.14                 |
| Global cognition             | 0.26       |                           | -0.03 (-0.07 to 0.01)    | 0.19                 |

\*Summarized with correlation coefficient or mean (SD).

<sup>†</sup>Odds ratio (OR), 95% confidence interval (CI), and p value from multivariable logistic model and parameter estimates (PEs), 95% CIs, and p values from multivariable linear regression models adjusted for age, sex, years of education, smoking status, diabetes, hypertension, APOE ε4 carriership, and hearing rehabilitation. OR/PEs represent the association of a 10% decrease (worsening) in WRS with outcome.

| Cognitive status*            | WRS in %     |               | OR (95% CI) <sup>†</sup> | p value <sup>†</sup> |
|------------------------------|--------------|---------------|--------------------------|----------------------|
|                              | 100<br>n=628 | <100<br>n=545 |                          |                      |
| Unimpaired                   | 562 (89)     | 453 (83)      | 1.00 (0.67-1.50)         | 0.99                 |
| Mild cognitive impairment    | 66 (11)      | 92 (17)       |                          |                      |
| Z-score*                     |              |               | PE (95% CI) <sup>†</sup> | p value <sup>†</sup> |
| Memory                       | 0.06 (1.11)  | -0.56 (1.07)  | -0.19 (-0.32 to -0.06)   | 0.005                |
| Attention/executive function | 0.12 (1.06)  | -0.49 (1.07)  | -0.09 (-0.22 to 0.03)    | 0.15                 |
| Language                     | 0.06 (1.10)  | -0.48 (1.10)  | -0.18 (-0.32 to -0.04)   | 0.01                 |
| Visuospatial skills          | 0.06 (1.04)  | -0.34 (1.04)  | -0.14 (-0.27 to -0.01)   | 0.03                 |
| Global cognition             | 0.10 (1.09)  | -0.58 (1.07)  | -0.17 (-0.29 to -0.05)   | 0.006                |

\*Summarized with mean (SD) or n (%).

<sup>†</sup>Odds ratio (OR), 95% confidence interval (CI), and p value from multivariable logistic model and parameter estimates (PEs), 95% CIs, and p values from multivariable linear regression models adjusted for age, sex, years of education, smoking status, diabetes, hypertension, APOE ε4 carriership, and hearing rehabilitation. OR/PEs represent the association of less than perfect speech comprehension (WRS <100 vs 100%) with outcome.

**Table S10.** Associations of informant-based hearing difficulties with cross-sectional outcomes at enrollment.

|                              | <b>Hearing Difficulties</b> |              | <b>OR (95% CI)<sup>†</sup></b> | <b>p value<sup>†</sup></b> |
|------------------------------|-----------------------------|--------------|--------------------------------|----------------------------|
|                              | No<br>n=789                 | Yes<br>n=388 |                                |                            |
| <b>Cognitive status*</b>     |                             |              |                                |                            |
| Unimpaired                   | 701 (89)                    | 320 (82)     |                                |                            |
| Mild cognitive impairment    | 88 (11)                     | 68 (18)      | 1.49 (1.02-2.19)               | 0.04                       |
| <b>Z-score*</b>              |                             |              | <b>PE (95% CI)<sup>†</sup></b> | <b>p value<sup>†</sup></b> |
| Memory                       | -0.13 (1.12)                | -0.40 (1.13) | -0.13 (-0.26 to 0.00)          | 0.05                       |
| Attention/executive function | -0.07 (1.10)                | -0.33 (1.09) | -0.15 (-0.27 to -0.03)         | 0.01                       |
| Language                     | -0.11 (1.12)                | -0.32 (1.12) | -0.12 (-0.26 to 0.01)          | 0.08                       |
| Visuospatial skills          | -0.09 (1.06)                | -0.19 (1.05) | -0.16 (-0.28 to -0.04)         | 0.009                      |
| Global cognition             | -0.12 (1.13)                | -0.38 (1.10) | -0.18 (-0.30 to -0.06)         | 0.003                      |

\*Summarized with mean (SD) or n (%).

<sup>†</sup>Odds ratio (OR), 95% confidence interval (CI), and p value from multivariable logistic model and parameter estimates (PEs), 95% CIs, and p values from multivariable linear regression models adjusted for age, sex, years of education, smoking status, diabetes, hypertension, APOE ε4 carriership, and hearing rehabilitation. OR/PEs represent the association of informant-based hearing difficulties (yes vs no) with outcome.
